# Supplementary material for: Effect of Needle Gauge Size on Pain During Intravitreal Anti-VEGF Injection: A Systematic Review and Network Meta-Analysis
Source: Springer Nature journal article supplement (doi:10.1007/s40123-023-00879-7), 2024-01-24
Supplement: MOESM1 [file 26658060]

## **Supplementary Material**

**Part 1.** Details of the literature search in each individual database

**Part 2.** Details of the direct and indirect estimates of the meta-analysis.

### **Title**

Effect of Needle Gauge Size on Pain during Intravitreal Anti-VEGF Injection: A Systematic Review and Network Meta-Analysis

### **Authors**

Emilie T. S. Butler, MS <sup>1</sup>; Jakob Bjerager, MD <sup>1</sup>; Nathalie S. Eriksen, MD <sup>2</sup>;  
Javad N. Hajari, MD PhD <sup>1,3</sup>; Miklos Schneider, MD PhD <sup>1,4</sup>; Carsten Faber, MD PhD <sup>1,3</sup>;  
Yousif Subhi, MD PhD <sup>1,2,5</sup>

### **Affiliations**

1. Department of Ophthalmology, Rigshospitalet, Glostrup, Denmark.
2. Department of Ophthalmology, Zealand University Hospital, Roskilde, Denmark.
3. Faculty of Health and Medical Sciences, University of Copenhagen, Copenhagen, Denmark.
4. Department of Ophthalmology, Semmelweis University, Budapest, Hungary
5. Department of Clinical Research, University of Southern Denmark, Odense, Denmark.

### **Corresponding author**

Yousif Subhi, MD PhD, FEBO, assoc. professor. Department of Clinical Research, University of Southern Denmark, J.B. Winsløvs Vej 19.3, 5000 Odense C, Denmark.

### **E-mail**

ysubhi@gmail.com

**Part 1.** Details of the literature search in each individual database.

**PubMed:**

History and Search Details Download Delete

| Search | Actions | Details | Query                                                                                                                                                                                                                                                                                                                                                                                                                                                                                                                                                                                                                                                                                                                                                                                                                                                                                                                                                                                                                                                                                                                                                                                                                                                                                                                                                                                                                                                                                                                                                                                                  | Results | Time     |
|--------|---------|---------|--------------------------------------------------------------------------------------------------------------------------------------------------------------------------------------------------------------------------------------------------------------------------------------------------------------------------------------------------------------------------------------------------------------------------------------------------------------------------------------------------------------------------------------------------------------------------------------------------------------------------------------------------------------------------------------------------------------------------------------------------------------------------------------------------------------------------------------------------------------------------------------------------------------------------------------------------------------------------------------------------------------------------------------------------------------------------------------------------------------------------------------------------------------------------------------------------------------------------------------------------------------------------------------------------------------------------------------------------------------------------------------------------------------------------------------------------------------------------------------------------------------------------------------------------------------------------------------------------------|---------|----------|
| #1     | ...     | ▼       | <p>Search: ("intravitral"[All Fields] OR "intravitreal"[All Fields] OR "intravitreally"[All Fields] OR "intravitreous"[All Fields] OR "intravitreously"[All Fields]) AND ("pegaptanib"[Supplementary Concept] OR "pegaptanib"[All Fields] OR ("bevacizumab"[MeSH Terms] OR "bevacizumab"[All Fields] OR "bevacizumab s"[All Fields]) OR ("aflibercept"[Supplementary Concept] OR "aflibercept"[All Fields]) OR ("ranibizumab"[MeSH Terms] OR "ranibizumab"[All Fields]) OR ("brolucizumab"[Supplementary Concept] OR "brolucizumab"[All Fields]) OR ("kh902 fusion protein"[Supplementary Concept] OR "kh902 fusion protein"[All Fields] OR "conbercept"[All Fields]) OR ("faricimab"[Supplementary Concept] OR "faricimab"[All Fields])) AND ("pain"[MeSH Terms] OR "pain"[All Fields]) Sort by: Most Recent</p> <p>("intravitral"[All Fields] OR "intravitreal"[All Fields] OR "intravitreally"[All Fields] OR "intravitreous"[All Fields] OR "intravitreously"[All Fields]) AND ("pegaptanib"[Supplementary Concept] OR "pegaptanib"[All Fields] OR ("bevacizumab"[MeSH Terms] OR "bevacizumab"[All Fields] OR "bevacizumab s"[All Fields]) OR ("aflibercept"[Supplementary Concept] OR "aflibercept"[All Fields]) OR ("ranibizumab"[MeSH Terms] OR "ranibizumab"[All Fields]) OR ("brolucizumab"[Supplementary Concept] OR "brolucizumab"[All Fields]) OR ("kh902 fusion protein"[Supplementary Concept] OR "kh902 fusion protein"[All Fields] OR "conbercept"[All Fields]) OR ("faricimab"[Supplementary Concept] OR "faricimab"[All Fields])) AND ("pain"[MeSH Terms] OR "pain"[All Fields])</p> | 177     | 12:39:19 |

Showing 1 to 1 of 1 entries

**EMBASE:**

Embase <1974 to 2023 October 13>

- 1 intravitreal.mp. [mp=title, abstract, heading word, drug trade name, original title, device manufacturer, drug manufacturer, device trade name, keyword heading word, floating subheading word, candidate term word] 39625
- 2 intravitreal drug administration/ 6634
- 3 pegaptanib.mp. [mp=title, abstract, heading word, drug trade name, original title, device manufacturer, drug manufacturer, device trade name, keyword heading word, floating subheading word, candidate term word] 2593
- 4 pegaptanib/ 2519

5 bevacizumab.mp. [mp=title, abstract, heading word, drug trade name, original title, device manufacturer, drug manufacturer, device trade name, keyword heading word, floating subheading word, candidate term word] 77140

6 bevacizumab/ 74758

7 aflibercept.mp. [mp=title, abstract, heading word, drug trade name, original title, device manufacturer, drug manufacturer, device trade name, keyword heading word, floating subheading word, candidate term word] 9495

8 aflibercept/ 9163

9 ranibizumab.mp. [mp=title, abstract, heading word, drug trade name, original title, device manufacturer, drug manufacturer, device trade name, keyword heading word, floating subheading word, candidate term word] 13081

10 ranibizumab/ 12699

11 brolocizumab.mp. [mp=title, abstract, heading word, drug trade name, original title, device manufacturer, drug manufacturer, device trade name, keyword heading word, floating subheading word, candidate term word] 620

12 brolocizumab/ 605

13 conbercept.mp. [mp=title, abstract, heading word, drug trade name, original title, device manufacturer, drug manufacturer, device trade name, keyword heading word, floating subheading word, candidate term word] 657

14 conbercept/ 589

15 faricimab.mp. [mp=title, abstract, heading word, drug trade name, original title, device manufacturer, drug manufacturer, device trade name, keyword heading word, floating subheading word, candidate term word] 311

16 faricimab/ 301

17 pain.mp. [mp=title, abstract, heading word, drug trade name, original title, device manufacturer, drug manufacturer, device trade name, keyword heading word, floating subheading word, candidate term word] 1598283

18 pain/ 366016

19 1 or 2 39625

20 3 or 4 or 5 or 6 or 7 or 8 or 9 or 10 or 11 or 12 or 13 or 14 or 15 or 16 88223

21 17 or 18 1598283

22 19 and 20 and 21 708

Search History  
(22searches found)

# ▲ Searches

Results

|    |                                                                                                                                                                                                                      |       |
|----|----------------------------------------------------------------------------------------------------------------------------------------------------------------------------------------------------------------------|-------|
| 1  | intravitreal.mp. [mp=title, abstract, heading word, drug trade name, original title, device manufacturer, drug manufacturer, device trade name, keyword heading word, floating subheading word, candidate term word] | 39625 |
| 2  | intravitreal drug administration/                                                                                                                                                                                    | 6634  |
| 3  | pegaptanib.mp. [mp=title, abstract, heading word, drug trade name, original title, device manufacturer, drug manufacturer, device trade name, keyword heading word, floating subheading word, candidate term word]   | 2593  |
| 4  | pegaptanib/                                                                                                                                                                                                          | 2519  |
| 5  | bevacizumab.mp. [mp=title, abstract, heading word, drug trade name, original title, device manufacturer, drug manufacturer, device trade name, keyword heading word, floating subheading word, candidate term word]  | 77140 |
| 6  | bevacizumab/                                                                                                                                                                                                         | 74758 |
| 7  | aflibercept.mp. [mp=title, abstract, heading word, drug trade name, original title, device manufacturer, drug manufacturer, device trade name, keyword heading word, floating subheading word, candidate term word]  | 9495  |
| 8  | aflibercept/                                                                                                                                                                                                         | 9163  |
| 9  | ranibizumab.mp. [mp=title, abstract, heading word, drug trade name, original title, device manufacturer, drug manufacturer, device trade name, keyword heading word, floating subheading word, candidate term word]  | 13081 |
| 10 | ranibizumab/                                                                                                                                                                                                         | 12699 |
| 11 | brolocizumab.mp. [mp=title, abstract, heading word, drug trade name, original title, device manufacturer, drug manufacturer, device trade name, keyword heading word, floating subheading word, candidate term word] | 620   |
| 12 | brolocizumab/                                                                                                                                                                                                        | 605   |

|    |                                                                                                                                                                                                                    |         |
|----|--------------------------------------------------------------------------------------------------------------------------------------------------------------------------------------------------------------------|---------|
| 13 | conbercept.mp. [mp=title, abstract, heading word, drug trade name, original title, device manufacturer, drug manufacturer, device trade name, keyword heading word, floating subheading word, candidate term word] | 657     |
| 14 | conbercept/                                                                                                                                                                                                        | 589     |
| 15 | faricimab.mp. [mp=title, abstract, heading word, drug trade name, original title, device manufacturer, drug manufacturer, device trade name, keyword heading word, floating subheading word, candidate term word]  | 311     |
| 16 | faricimab/                                                                                                                                                                                                         | 301     |
| 17 | pain.mp. [mp=title, abstract, heading word, drug trade name, original title, device manufacturer, drug manufacturer, device trade name, keyword heading word, floating subheading word, candidate term word]       | 1598283 |
| 18 | pain/                                                                                                                                                                                                              | 366016  |
| 19 | 1 or 2                                                                                                                                                                                                             | 39625   |
| 20 | 3 or 4 or 5 or 6 or 7 or 8 or 9 or 10 or 11 or 12 or 13 or 14 or 15 or 16                                                                                                                                          | 88223   |
| 21 | 17 or 18                                                                                                                                                                                                           | 1598283 |
| 22 | 19 and 20 and 21                                                                                                                                                                                                   | 708     |

**Cochrane Central:**

Search Name:

Date Run:15/10/2023 06:02:18

Comment:

| ID | Search                                                                                             | Hits   |
|----|----------------------------------------------------------------------------------------------------|--------|
| #1 | intravitreal                                                                                       | 4556   |
| #2 | bevacizumab OR ranibizumab OR aflibercept OR conbercept OR brolocizumab OR faricimab OR pegaptanib | 10398  |
| #3 | pain                                                                                               | 242674 |
| #4 | #1 AND #2 AND #3                                                                                   | 129    |

Web of Science Core Collection, BIOSIS Previews, Current Contents Connect, Data Citation Index, Derwent Innovations Index, KCI-Korean Journal Database, Preprint Citation Index, ProQuest™ Dissertations & Theses Citation Index, and SciELO Citation Index:

**796 results from Web of Science Core Collection, BIOSIS Previews, Current Contents Connect, Data Citation Index, Derwent Innovations Index, KCI-Korean Journal Database, Preprint Citation Index, ProQuest™ Dissertations & Theses Citation Index, SciELO Citation Index:**

Analyze Results

Citation Report

 Create

Q (((((((TS=(bevacizumab)) OR TS=(aflibercept)) OR TS=(ranibizumab)) OR TS=(brolucizumab)) OR TS=...

×

More options ▾

[Search Help](#)

Query Preview

((((((((TS=(bevacizumab)) OR TS=(aflibercept)) OR TS=(ranibizumab)) OR TS=(brolucizumab)) OR TS=(pegaptanib)) OR TS=(faricimab)) OR TS=(conbercept)) AND TS=(pain) AND TS=(pain)

+ Add date range

× Clear

Search

**Part 2.** Details of the direct and indirect estimates of the meta-analysis.

| ID                              | Comparison                 | Active | Control | d     | LCI 95% | HCI 95% |
|---------------------------------|----------------------------|--------|---------|-------|---------|---------|
| Direct estimates                |                            |        |         |       |         |         |
| 1                               | 32G-30G                    | 32G    | 30G     | 0,00  | -0,30   | 0,30    |
| 2                               | 33G-30G                    | 33G    | 30G     | -0,18 | -0,40   | 0,04    |
| 3                               | 26G-30G                    | 26G    | 30G     | 4,35  | 3,53    | 5,16    |
| 4                               | 27G-30G                    | 27G    | 30G     | 1,23  | -0,20   | 2,66    |
| 5                               | 29G-30G                    | 29G    | 30G     | 1,37  | 1,03    | 1,71    |
| 6                               | 34G-30G                    | 34G    | 30G     | -0,99 | -1,34   | -0,64   |
| 7                               | 27G-26G                    | 27G    | 26G     | -0,09 | -0,73   | 0,55    |
| 8                               | 29G-26G                    | 29G    | 26G     | -2,62 | -3,27   | -1,97   |
| 9                               | 29G-27G                    | 29G    | 27G     | -2,56 | -3,14   | -1,98   |
| Indirect estimates (source IDs) |                            |        |         |       |         |         |
| 10                              | Indirect 32G vs 26G (1, 3) | 32G    | 26G     | -4,35 | -5,21   | -3,48   |
| 11                              | Indirect 33G vs 26G (2, 3) | 33G    | 26G     | -4,53 | -5,37   | -3,68   |
| 12                              | Indirect 29G vs 26G (9, 7) | 29G    | 26G     | -2,65 | -3,51   | -1,79   |
| 13                              | Indirect 30G vs 26G (4, 7) | 30G    | 26G     | -1,32 | -2,89   | 0,25    |
| 14                              | Indirect 30G vs 26G (5, 8) | 30G    | 26G     | -3,99 | -4,72   | -3,26   |
| 15                              | Indirect 27G vs 26G (9, 8) | 27G    | 26G     | -0,06 | -0,93   | 0,81    |
| 16                              | Indirect 27G vs 26G (4, 3) | 27G    | 26G     | -3,11 | -4,76   | -1,47   |
| 17                              | Indirect 29G vs 26G (5, 3) | 29G    | 26G     | -2,97 | -3,85   | -2,09   |
| 18                              | Indirect 34G vs 26G (6, 3) | 34G    | 26G     | -5,33 | -6,22   | -4,45   |
| Result estimates (source IDs)   |                            |        |         |       |         |         |
|                                 | 32G (10)                   | 32G    | 26G     | -4,35 | -5,21   | -3,48   |
|                                 | 30G (3, 13, 14)            | 30G    | 26G     | -3,85 | -5,28   | -2,41   |
|                                 | 33G (11)                   | 33G    | 26G     | -4,53 | -5,37   | -3,68   |
|                                 | 27G (7, 15, 16)            | 27G    | 26G     | -0,35 | -1,86   | 1,16    |
|                                 | 29G (8, 12, 17)            | 29G    | 26G     | -2,72 | -3,16   | -2,27   |
|                                 | 34G (18)                   | 34G    | 26G     | -5,33 | -6,22   | -4,45   |
